# Supplementary material
Source: publisher site journal article supplement (https://www.e-cmh.org/upload/media/cmh-2022-0450-Supplementary-Table-2.pdf)
Supplement: Supplementary file 1 [file cmh-2022-0450-Supplementary-Table-2.pdf]

**Supplementary Table 2.** ICD-9 and 10 codes for definition of chronic liver diseases (HCV, HBV, ALD, NAFLD, and others)

| Chronic liver disease | ICD-9 codes | ICD-10 codes  | ICD-9 Description                                                                                           | ICD-10 Description                                                                                                   |
|-----------------------|-------------|---------------|-------------------------------------------------------------------------------------------------------------|----------------------------------------------------------------------------------------------------------------------|
| HCV                   | 07041       | B1711         | Acute hepatitis C with hepatic coma                                                                         | Acute hepatitis C with hepatic coma                                                                                  |
| -                     | 07044       | B182          | Chronic hepatitis C with hepatic coma                                                                       | Chronic viral hepatitis C                                                                                            |
| -                     | 07051       | B1710         | Acute hepatitis C without mention of hepatic coma                                                           | Acute hepatitis C without hepatic coma                                                                               |
| -                     | 07054       | B182          | Chronic hepatitis C without mention of hepatic coma                                                         | Chronic viral hepatitis C                                                                                            |
| -                     | 0707        | NA            | Unspecified viral hepatitis C without hepatic coma                                                          | NA                                                                                                                   |
| -                     | 07070       | B1920         | Unspecified viral hepatitis C without hepatic coma                                                          | Unspecified viral hepatitis C without hepatic coma                                                                   |
| -                     | 07071       | B1921         | Unspecified viral hepatitis C with hepatic coma                                                             | Unspecified viral hepatitis C with hepatic coma                                                                      |
| -                     | V0262       | Z2252         | Hepatitis C carrier                                                                                         | Carrier of viral hepatitis C                                                                                         |
| HBV                   | 0702        | NA            | Viral hepatitis b with hepatic coma                                                                         | NA                                                                                                                   |
| -                     | 07020       | B162          | Viral hepatitis B with hepatic coma, acute or unspecified, without mention of hepatitis delta               | Acute hepatitis B without delta-agent with hepatic coma                                                              |
| -                     | 07021       | B160          | Viral hepatitis B with hepatic coma, acute or unspecified, with hepatitis delta                             | Unspecified viral hepatitis B with hepatic coma<br>Acute hepatitis B with delta-agent with hepatic coma              |
| -                     | 07022       | B181          | Chronic viral hepatitis B with hepatic coma without hepatitis delta                                         | Chronic viral hepatitis B without delta-agent                                                                        |
| -                     | 07023       | B180          | Chronic viral hepatitis B with hepatic coma with hepatitis delta                                            | Chronic viral hepatitis B with delta-agent                                                                           |
| -                     | 0703        | NA            | Viral hepatitis b without mention of hepatic coma                                                           | NA                                                                                                                   |
| -                     | 07030       | B169<br>B1910 | Viral hepatitis B without mention of hepatic coma, acute or unspecified, without mention of hepatitis delta | Acute hepatitis B without delta-agent and without hepatic coma<br>Unspecified viral hepatitis B without hepatic coma |
| -                     | 07031       | B161          | Viral hepatitis B without mention of hepatic coma, acute or unspecified, with hepatitis delta               | Acute hepatitis B with delta-agent without hepatic coma                                                              |
| -                     | 07032       | B181          | Chronic viral hepatitis B without mention of hepatic coma without mention of hepatitis delta                | Chronic viral hepatitis B without delta-agent                                                                        |
| -                     | 07033       | B180          | Chronic viral hepatitis B without mention of hepatic coma with hepatitis delta                              | Chronic viral hepatitis B with delta-agent                                                                           |
| -                     | V0261       | Z2251         | Hepatitis B carrier                                                                                         | Carrier of viral hepatitis B                                                                                         |
| ALD                   | 291         | NA            | Alcohol-induced mental disorders                                                                            | NA                                                                                                                   |
| -                     | 2910        | F10231        | Alcohol withdrawal delirium                                                                                 | Alcohol dependence with withdrawal delirium                                                                          |
| -                     | 2911        | F1096         | Alcohol-induced persisting amnesic disorder                                                                 | Alcohol use, unspecified with alcohol-induced persisting amnesic disorder                                            |

Supplementary Table 2. Continued

| Chronic liver disease | ICD-9 codes | ICD-10 codes | ICD-9 Description                                      | ICD-10 Description                                                                   |
|-----------------------|-------------|--------------|--------------------------------------------------------|--------------------------------------------------------------------------------------|
| -                     | 2912        | F1027        | Alcohol-induced persisting dementia                    | Alcohol dependence with alcohol-induced persisting dementia                          |
| -                     | 2913        | F10951       | Alcohol-induced psychotic disorder with hallucinations | Alcohol use, unspecified with alcohol-induced psychotic disorder with hallucinations |
| -                     | 2914        | F10929       | Idiosyncratic alcohol intoxication                     | Alcohol use, unspecified with intoxication, unspecified                              |
| -                     | 2915        | F10950       | Alcohol-induced psychotic disorder with delusions      | Alcohol use, unspecified with alcohol-induced psychotic disorder with delusions      |
| -                     | 2919        | F1099        | Unspecified alcohol-induced mental disorders           | Alcohol use, unspecified with unspecified alcohol-induced disorder                   |
| -                     | 3575        | G621         | Alcoholic polyneuropathy                               | Alcoholic polyneuropathy                                                             |
| -                     | 4255        | I426         | Alcoholic cardiomyopathy                               | Alcoholic cardiomyopathy                                                             |
| -                     | 5710        | K700         | Alcoholic fatty liver                                  | Alcoholic fatty liver                                                                |
| -                     | 5711        | K7010        | Acute alcoholic hepatitis                              | Alcoholic hepatitis without ascites                                                  |
| -                     | 5712        | K7030        | Alcoholic cirrhosis of liver                           | Alcoholic cirrhosis of liver without ascites                                         |
| -                     | 5713        | K709         | Alcoholic liver damage, unspecified                    | Alcoholic liver disease, unspecified                                                 |
| -                     | 7903        | R780         | Excessive blood level of alcohol                       | Finding of alcohol in blood                                                          |
| -                     | 9808        | T518X1A      | Toxic effect of other specified alcohols               | Toxic effect of other alcohols, accidental (unintentional), initial encounter        |
| -                     | 9808        | T518X2A      | Toxic effect of other specified alcohols               | Toxic effect of other alcohols, intentional self-harm, initial encounter             |
| -                     | 9808        | T518X3A      | Toxic effect of other specified alcohols               | Toxic effect of other alcohols, assault, initial encounter                           |
| -                     | 9808        | T518X4A      | Toxic effect of other specified alcohols               | Toxic effect of other alcohols, undetermined, initial encounter                      |
| -                     | 9809        | T5191XA      | Toxic effect of unspecified alcohol                    | Toxic effect of unspecified alcohol, accidental (unintentional), initial encounter   |
| -                     | 9809        | T5192XA      | Toxic effect of other specified alcohols               | Toxic effect of unspecified alcohol, intentional self-harm, initial encounter        |
| -                     | 9809        | T5193XA      | Toxic effect of other specified alcohols               | Toxic effect of unspecified alcohol, assault, initial encounter                      |
| -                     | 9809        | T5194XA      | Toxic effect of other specified alcohols               | Toxic effect of unspecified alcohol, undetermined, initial encounter                 |
| -                     | 29181       | F10239       | Alcohol withdrawal                                     | Alcohol dependence with withdrawal, unspecified                                      |
| -                     | 29182       | F10182       | Alcohol induced sleep disorders                        | Alcohol abuse with alcohol-induced sleep disorder                                    |

Supplementary Table 2. Continued

| Chronic liver disease | ICD-9 codes | ICD-10 codes | ICD-9 Description                                        | ICD-10 Description                                                            |
|-----------------------|-------------|--------------|----------------------------------------------------------|-------------------------------------------------------------------------------|
| -                     | 29182       | F10282       | Alcohol induced sleep disorders                          | Alcohol dependence with alcohol-induced sleep disorder                        |
| -                     | 29182       | F10982       | Alcohol induced sleep disorders                          | Alcohol use, unspecified with alcohol-induced sleep disorder                  |
| -                     | 29189       | F10159       | Other alcohol-induced mental disorders                   | Alcohol abuse with alcohol-induced psychotic disorder, unspecified            |
| -                     | 29189       | F10180       | Other alcohol-induced mental disorders                   | Alcohol abuse with alcohol-induced anxiety disorder                           |
| -                     | 29189       | F10181       | Other alcohol-induced mental disorders                   | Alcohol abuse with alcohol-induced sexual dysfunction                         |
| -                     | 29189       | F10188       | Other alcohol-induced mental disorders                   | Alcohol abuse with other alcohol-induced disorder                             |
| -                     | 29189       | F10259       | Other alcohol-induced mental disorders                   | Alcohol dependence with alcohol-induced psychotic disorder, unspecified       |
| -                     | 29189       | F10280       | Other alcohol-induced mental disorders                   | Alcohol dependence with alcohol-induced anxiety disorder                      |
| -                     | 29189       | F10281       | Other alcohol-induced mental disorders                   | Alcohol dependence with alcohol-induced sexual dysfunction                    |
| -                     | 29189       | F10288       | Other alcohol-induced mental disorders                   | Alcohol dependence with other alcohol-induced disorder                        |
| -                     | 29189       | F10959       | Other alcohol-induced mental disorders                   | Alcohol use, unspecified with alcohol-induced psychotic disorder, unspecified |
| -                     | 29189       | F10980       | Other alcohol-induced mental disorders                   | Alcohol use, unspecified with alcohol-induced anxiety disorder                |
| -                     | 303         | NA           | Alcohol dependence syndrome                              | NA                                                                            |
| -                     | 30300       | F10229       | Acute alcoholic intoxication in alcoholism, unspecified  | Alcohol dependence with intoxication, unspecified                             |
| -                     | 30301       | F10229       | Acute alcoholic intoxication in alcoholism, continuous   | Alcohol dependence with intoxication, unspecified                             |
| -                     | 30302       | F10229       | Acute alcoholic intoxication in alcoholism, episodic     | Alcohol dependence with intoxication, unspecified                             |
| -                     | 30303       | F10229       | Acute alcoholic intoxication in alcoholism, in remission | Alcohol dependence with intoxication, unspecified                             |
| -                     | 3039        | NA           | Other and unspecified alcohol dependence                 | NA                                                                            |
| -                     | 30390       | F1020        | Other and unspecified alcohol dependence, unspecified    | Alcohol dependence, uncomplicated                                             |
| -                     | 30391       | F1020        | Other and unspecified alcohol dependence, continuous     | Alcohol dependence, uncomplicated                                             |
| -                     | 30392       | F1020        | Other and unspecified alcohol dependence, episodic       | Alcohol dependence, uncomplicated                                             |
| -                     | 30393       | F1021        | Other and unspecified alcohol dependence, in remission   | Alcohol dependence, in remission                                              |
| -                     | 30500       | F1010        | Alcohol abuse, unspecified                               | Alcohol abuse, uncomplicated                                                  |
| -                     | 30501       | F1010        | Alcohol abuse, continuous                                | Alcohol abuse, uncomplicated                                                  |
| -                     | 30502       | F1010        | Alcohol abuse, episodic                                  | Alcohol abuse, uncomplicated                                                  |

Supplementary Table 2. Continued

| Chronic liver disease | ICD-9 codes | ICD-10 codes | ICD-9 Description                                  | ICD-10 Description                                             |
|-----------------------|-------------|--------------|----------------------------------------------------|----------------------------------------------------------------|
| -                     | 30503       | F1011        | Alcohol abuse, in remission                        | Alcohol abuse, in remission                                    |
| -                     | 53530       | K2920        | Alcoholic gastritis, without mention of hemorrhage | Alcoholic gastritis without bleeding                           |
| -                     | 53531       | K2921        | Alcoholic gastritis, with hemorrhage               | Alcoholic gastritis with bleeding                              |
| -                     | E8600       | NoDx         | Accidental poisoning by alcoholic beverages        | NA                                                             |
| -                     | E8608       | NoDx         | Accidental poisoning by other specified alcohols   | NA                                                             |
| -                     | E8609       | NoDx         | Accidental poisoning by unspecified alcohol        | NA                                                             |
| -                     | V113        | Z658         | Personal history of alcoholism                     | Other specified problems related to psychosocial circumstances |
| NAFLD*                | NA          | K760         | NA                                                 | Fatty (change of) liver, not elsewhere classified              |
| -                     | NA          | K7581        | NA                                                 | nonalcoholic steatohepatitis                                   |
| -                     | 2724        | E784         | Other and unspecified hyperlipidemia               | Other hyperlipidemia                                           |
| -                     | 2724        | E785         | Other and unspecified hyperlipidemia               | Hyperlipidemia, unspecified                                    |
| -                     | 4010        | I10          | Malignant essential hypertension                   | Essential (primary) hypertension                               |
| -                     | 4011        | I10          | Benign essential hypertension                      | Essential (primary) hypertension                               |
| -                     | 4019        | I10          | Unspecified essential hypertension                 | Essential (primary) hypertension                               |
| -                     | 4019        | I169         | Unspecified essential hypertension                 | Hypertensive crisis, unspecified                               |
| -                     | 40501       | I150         | Malignant renovascular hypertension                | Renovascular hypertension                                      |
| -                     | 40511       | I150         | Benign renovascular hypertension                   | Renovascular hypertension                                      |
| -                     | 40519       | I158         | Other benign secondary hypertension                | Other secondary hypertension                                   |
| -                     | 40591       | I150         | Unspecified renovascular hypertension              | Renovascular hypertension                                      |
| -                     | 40599       | I158         | Other unspecified secondary hypertension           | Other secondary hypertension                                   |
| -                     | 278         | NA           | Overweight, obesity and other hyperalimentation    | NA                                                             |
| -                     | 2501        | NA           | Diabetes with ketoacidosis                         | NA                                                             |
| -                     | 2502        | NA           | Diabetes with hyperosmolarity                      | NA                                                             |
| -                     | 2503        | NA           | Diabetes with other coma                           | NA                                                             |
| -                     | 2504        | NA           | Diabetes with renal manifestations                 | NA                                                             |
| -                     | 2505        | NA           | Diabetes with ophthalmic manifestations            | NA                                                             |
| -                     | 2506        | NA           | Diabetes with neurological manifestations          | NA                                                             |
| -                     | 2507        | NA           | Diabetes with peripheral circulatory disorders     | NA                                                             |

Supplementary Table 2. Continued

| Chronic liver disease | ICD-9 codes | ICD-10 codes | ICD-9 Description                                                                                          | ICD-10 Description                                                                                       |
|-----------------------|-------------|--------------|------------------------------------------------------------------------------------------------------------|----------------------------------------------------------------------------------------------------------|
| -                     | 2508        | NA           | Diabetes with other specified manifestations                                                               | NA                                                                                                       |
| -                     | 2509        | NA           | Diabetes with unspecified complication                                                                     | NA                                                                                                       |
| -                     | 2777        | E8881        | Dysmetabolic syndrome X                                                                                    | Metabolic syndrome                                                                                       |
| -                     | 2780        | NA           | Overweight and obesity                                                                                     | NA                                                                                                       |
| -                     | 25000       | E119         | Diabetes mellitus without mention of complication, type II or unspecified type, not stated as uncontrolled | Type 2 diabetes mellitus without complications                                                           |
| -                     | 25002       | E1165        | Diabetes mellitus without mention of complication, type II or unspecified type, uncontrolled               | Type 2 diabetes mellitus with hyperglycemia                                                              |
| -                     | 25010       | E1110        | Diabetes with ketoacidosis, type II or unspecified type, not stated as uncontrolled                        | Type 2 diabetes mellitus with ketoacidosis without coma                                                  |
| -                     | 25010       | E1169        | Diabetes with ketoacidosis, type II or unspecified type, not stated as uncontrolled                        | Type 2 diabetes mellitus with other specified complication                                               |
| -                     | 25010       | E1310        | Diabetes with ketoacidosis, type II or unspecified type, not stated as uncontrolled                        | Other specified diabetes mellitus with ketoacidosis without coma                                         |
| -                     | 25012       | E1110        | Diabetes with ketoacidosis, type II or unspecified type, uncontrolled                                      | Type 2 diabetes mellitus with ketoacidosis without coma                                                  |
| -                     | 25012       | E1165        | Diabetes with ketoacidosis, type II or unspecified type, uncontrolled                                      | Type 2 diabetes mellitus with hyperglycemia                                                              |
| -                     | 25012       | E1169        | Diabetes with ketoacidosis, type II or unspecified type, uncontrolled                                      | Type 2 diabetes mellitus with other specified complication                                               |
| -                     | 25012       | E1310        | Diabetes with ketoacidosis, type II or unspecified type, uncontrolled                                      | Other specified diabetes mellitus with ketoacidosis without coma                                         |
| -                     | 25020       | E1100        | Diabetes with hyperosmolarity, type II or unspecified type, not stated as uncontrolled                     | Type 2 diabetes mellitus with hyperosmolarity without nonketotic hyperglycemic-hyperosmolar coma (NKHHC) |
| -                     | 25020       | E1101        | Diabetes with hyperosmolarity, type II or unspecified type, not stated as uncontrolled                     | Type 2 diabetes mellitus with hyperosmolarity with coma                                                  |
| -                     | 25022       | E1100        | Diabetes with hyperosmolarity, type II or unspecified type, uncontrolled                                   | Type 2 diabetes mellitus with hyperosmolarity without nonketotic hyperglycemic-hyperosmolar coma (NKHHC) |
| -                     | 25022       | E1165        | Diabetes with hyperosmolarity, type II or unspecified type, uncontrolled                                   | Type 2 diabetes mellitus with hyperglycemia                                                              |
| -                     | 25030       | E1111        | Diabetes with other coma, type II or unspecified type, not stated as uncontrolled                          | Type 2 diabetes mellitus with ketoacidosis with coma                                                     |

Supplementary Table 2. Continued

| Chronic liver disease | ICD-9 codes | ICD-10 codes | ICD-9 Description                                                                                  | ICD-10 Description                                                                   |
|-----------------------|-------------|--------------|----------------------------------------------------------------------------------------------------|--------------------------------------------------------------------------------------|
| -                     | 25030       | E11641       | Diabetes with other coma, type II or unspecified type, not stated as uncontrolled                  | Type 2 diabetes mellitus with hypoglycemia with coma                                 |
| -                     | 25032       | E1101        | Diabetes with other coma, type II or unspecified type, uncontrolled                                | Type 2 diabetes mellitus with hyperosmolarity with coma                              |
| -                     | 25032       | E1165        | Diabetes with other coma, type II or unspecified type, uncontrolled                                | Type 2 diabetes mellitus with hyperglycemia                                          |
| -                     | 25040       | E1129        | Diabetes with renal manifestations, type II or unspecified type, not stated as uncontrolled        | Type 2 diabetes mellitus with other diabetic kidney complication                     |
| -                     | 25042       | E1121        | Diabetes with renal manifestations, type II or unspecified type, uncontrolled                      | Type 2 diabetes mellitus with diabetic nephropathy                                   |
| -                     | 25042       | E1165        | Diabetes with renal manifestations, type II or unspecified type, uncontrolled                      | Type 2 diabetes mellitus with hyperglycemia                                          |
| -                     | 25050       | E11311       | Diabetes with ophthalmic manifestations, type II or unspecified type, not stated as uncontrolled   | Type 2 diabetes mellitus with unspecified diabetic retinopathy with macular edema    |
| -                     | 25050       | E11319       | Diabetes with ophthalmic manifestations, type II or unspecified type, not stated as uncontrolled   | Type 2 diabetes mellitus with unspecified diabetic retinopathy without macular edema |
| -                     | 25050       | E1136        | Diabetes with ophthalmic manifestations, type II or unspecified type, not stated as uncontrolled   | Type 2 diabetes mellitus with diabetic cataract                                      |
| -                     | 25050       | E1139        | Diabetes with ophthalmic manifestations, type II or unspecified type, not stated as uncontrolled   | Type 2 diabetes mellitus with other diabetic ophthalmic complication                 |
| -                     | 25052       | E11311       | Diabetes with ophthalmic manifestations, type II or unspecified type, uncontrolled                 | Type 2 diabetes mellitus with unspecified diabetic retinopathy with macular edema    |
| -                     | 25052       | E11319       | Diabetes with ophthalmic manifestations, type II or unspecified type, uncontrolled                 | Type 2 diabetes mellitus with unspecified diabetic retinopathy without macular edema |
| -                     | 25052       | E1136        | Diabetes with ophthalmic manifestations, type II or unspecified type, uncontrolled                 | Type 2 diabetes mellitus with diabetic cataract                                      |
| -                     | 25052       | E1139        | Diabetes with ophthalmic manifestations, type II or unspecified type, uncontrolled                 | Type 2 diabetes mellitus with other diabetic ophthalmic complication                 |
| -                     | 25052       | E1165        | Diabetes with ophthalmic manifestations, type II or unspecified type, uncontrolled                 | Type 2 diabetes mellitus with hyperglycemia                                          |
| -                     | 25060       | E1140        | Diabetes with neurological manifestations, type II or unspecified type, not stated as uncontrolled | Type 2 diabetes mellitus with diabetic neuropathy, unspecified                       |

Supplementary Table 2. Continued

| Chronic liver disease | ICD-9 codes | ICD-10 codes | ICD-9 Description                                                                                       | ICD-10 Description                                                            |
|-----------------------|-------------|--------------|---------------------------------------------------------------------------------------------------------|-------------------------------------------------------------------------------|
| -                     | 25062       | E1140        | Diabetes with neurological manifestations, type II or unspecified type, uncontrolled                    | Type 2 diabetes mellitus with diabetic neuropathy, unspecified                |
| -                     | 25062       | E1165        | Diabetes with neurological manifestations, type II or unspecified type, uncontrolled                    | Type 2 diabetes mellitus with hyperglycemia                                   |
| -                     | 25070       | E1151        | Diabetes with peripheral circulatory disorders, type II or unspecified type, not stated as uncontrolled | Type 2 diabetes mellitus with diabetic peripheral angiopathy without gangrene |
| -                     | 25072       | E1151        | Diabetes with peripheral circulatory disorders, type II or unspecified type, uncontrolled               | Type 2 diabetes mellitus with diabetic peripheral angiopathy without gangrene |
| -                     | 25072       | E1165        | Diabetes with peripheral circulatory disorders, type II or unspecified type, uncontrolled               | Type 2 diabetes mellitus with hyperglycemia                                   |
| -                     | 25080       | E11618       | Diabetes with other specified manifestations, type II or unspecified type, not stated as uncontrolled   | Type 2 diabetes mellitus with other diabetic arthropathy                      |
| -                     | 25080       | E11620       | Diabetes with other specified manifestations, type II or unspecified type, not stated as uncontrolled   | Type 2 diabetes mellitus with diabetic dermatitis                             |
| -                     | 25080       | E11621       | Diabetes with other specified manifestations, type II or unspecified type, not stated as uncontrolled   | Type 2 diabetes mellitus with foot ulcer                                      |
| -                     | 25080       | E11622       | Diabetes with other specified manifestations, type II or unspecified type, not stated as uncontrolled   | Type 2 diabetes mellitus with other skin ulcer                                |
| -                     | 25080       | E11628       | Diabetes with other specified manifestations, type II or unspecified type, not stated as uncontrolled   | Type 2 diabetes mellitus with other skin complications                        |
| -                     | 25080       | E11630       | Diabetes with other specified manifestations, type II or unspecified type, not stated as uncontrolled   | Type 2 diabetes mellitus with periodontal disease                             |
| -                     | 25080       | E11638       | Diabetes with other specified manifestations, type II or unspecified type, not stated as uncontrolled   | Type 2 diabetes mellitus with other oral complications                        |
| -                     | 25080       | E11649       | Diabetes with other specified manifestations, type II or unspecified type, not stated as uncontrolled   | Type 2 diabetes mellitus with hypoglycemia without coma                       |
| -                     | 25080       | E1165        | Diabetes with other specified manifestations, type II or unspecified type, not stated as uncontrolled   | Type 2 diabetes mellitus with hyperglycemia                                   |
| -                     | 25080       | E1169        | Diabetes with other specified manifestations, type II or unspecified type, not stated as uncontrolled   | Type 2 diabetes mellitus with other specified complication                    |
| -                     | 25082       | E1165        | Diabetes with other specified manifestations, type II or unspecified type, uncontrolled                 | Type 2 diabetes mellitus with hyperglycemia                                   |

Supplementary Table 2. Continued

| Chronic liver disease          | ICD-9 codes | ICD-10 codes | ICD-9 Description                                                                               | ICD-10 Description                                         |
|--------------------------------|-------------|--------------|-------------------------------------------------------------------------------------------------|------------------------------------------------------------|
| -                              | 25082       | E1169        | Diabetes with other specified manifestations, type II or unspecified type, uncontrolled         | Type 2 diabetes mellitus with other specified complication |
| -                              | 25090       | E118         | Diabetes with unspecified complication, type II or unspecified type, not stated as uncontrolled | Type 2 diabetes mellitus with unspecified complications    |
| -                              | 25092       | E1165        | Diabetes with unspecified complication, type II or unspecified type, uncontrolled               | Type 2 diabetes mellitus with hyperglycemia                |
| -                              | 25092       | E118         | Diabetes with unspecified complication, type II or unspecified type, uncontrolled               | Type 2 diabetes mellitus with unspecified complications    |
| -                              | 27800       | E669         | Obesity, unspecified                                                                            | Obesity, unspecified                                       |
| -                              | 27801       | E6601        | Morbid obesity                                                                                  | Morbid (severe) obesity due to excess calories             |
| -                              | 27803       | E662         | Obesity hypoventilation syndrome                                                                | Morbid (severe) obesity with alveolar hypoventilation      |
| -                              | V4586       | Z9884        | Bariatric surgery status                                                                        | Bariatric surgery status                                   |
| -                              | V8530       | Z6830        | Body Mass Index 30.0-30.9, adult                                                                | Body mass index (BMI) 30.0-30.9, adult                     |
| -                              | V8531       | Z6831        | Body Mass Index 31.0-31.9, adult                                                                | Body mass index (BMI) 31.0-31.9, adult                     |
| -                              | V8532       | Z6832        | Body Mass Index 32.0-32.9, adult                                                                | Body mass index (BMI) 32.0-32.9, adult                     |
| -                              | V8533       | Z6833        | Body Mass Index 33.0-33.9, adult                                                                | Body mass index (BMI) 33.0-33.9, adult                     |
| -                              | V8534       | Z6834        | Body Mass Index 34.0-34.9, adult                                                                | Body mass index (BMI) 34.0-34.9, adult                     |
| -                              | V8535       | Z6835        | Body Mass Index 35.0-35.9, adult                                                                | Body mass index (BMI) 35.0-35.9, adult                     |
| -                              | V8536       | Z6836        | Body Mass Index 36.0-36.9, adult                                                                | Body mass index (BMI) 36.0-36.9, adult                     |
| -                              | V8537       | Z6837        | Body Mass Index 37.0-37.9, adult                                                                | Body mass index (BMI) 37.0-37.9, adult                     |
| -                              | V8538       | Z6838        | Body Mass Index 38.0-38.9, adult                                                                | Body mass index (BMI) 38.0-38.9, adult                     |
| -                              | V8539       | Z6839        | Body Mass Index 39.0-39.9, adult                                                                | Body mass index (BMI) 39.0-39.9, adult                     |
| -                              | V854        | NA           | Body mass index 40 and over, adult                                                              | NA                                                         |
| -                              | V8541       | Z6841        | Body Mass Index 40.0-44.9, adult                                                                | Body mass index (BMI) 40.0-44.9, adult                     |
| -                              | V8542       | Z6842        | Body Mass Index 45.0-49.9, adult                                                                | Body mass index (BMI) 45.0-49.9, adult                     |
| -                              | V8543       | Z6843        | Body Mass Index 50.0-59.9, adult                                                                | Body mass index (BMI) 50-59.9, adult                       |
| -                              | V8544       | Z6844        | Body Mass Index 60.0-69.9, adult                                                                | Body mass index (BMI) 60.0-69.9, adult                     |
| -                              | V8545       | Z6845        | Body Mass Index 70 and over, adult                                                              | Body mass index (BMI) 70 or greater, adult                 |
| Others                         | -           | -            | -                                                                                               | -                                                          |
| Alpha-1-antitrypsin deficiency | 2734        | E8801        | Alpha-1-antitrypsin deficiency                                                                  | Alpha-1-antitrypsin deficiency                             |



**Supplementary Table 2.** Continued

| Chronic liver disease                                       | ICD-9 codes | ICD-10 codes            | ICD-9 Description                                           | ICD-10 Description                                                                                     |
|-------------------------------------------------------------|-------------|-------------------------|-------------------------------------------------------------|--------------------------------------------------------------------------------------------------------|
| Disorders of iron metabolism                                | 2750        | NA                      | Disorders of iron metabolism                                | NA                                                                                                     |
| Disorders of copper metabolism                              | 2751        | E8300<br>E8301<br>E8309 | Disorders of copper metabolism                              | Disorder of copper metabolism, unspecified<br>Wilson's disease<br>Other disorders of copper metabolism |
| Disorders of porphyrin metabolism                           | 2771        | E800<br>E8020<br>E8029  | Disorders of porphyrin metabolism                           | Hereditary erythropoietic porphyria<br>Unspecified porphyria<br>Other porphyria                        |
| Hereditary hemochromatosis                                  | 27501       | E83110                  | Hereditary hemochromatosis                                  | Hereditary hemochromatosis                                                                             |
| Hemochromatosis due to repeated red blood cell transfusions | 27502       | E83111                  | Hemochromatosis due to repeated red blood cell transfusions | Hemochromatosis due to repeated red blood cell transfusions                                            |
| Other hemochromatosis                                       | 27503       | E83118<br>E83119        | Other hemochromatosis                                       | Other hemochromatosis<br>Hemochromatosis, unspecified                                                  |
| Other specified diseases of liver                           | NA          | K7689                   | NA                                                          | Other specified diseases of liver                                                                      |
| Autoimmune hepatitis                                        | 571.42      | K75.2-4                 | Autoimmune hepatitis                                        | Autoimmune hepatitis                                                                                   |
| a1 antitrypsin                                              | 273.4       | E88                     | a1 antitrypsin                                              | a1 antitrypsin                                                                                         |
| Primary sclerosing cholangitis                              | NA          | K83.01                  | NA                                                          | Primary sclerosing cholangitis                                                                         |

ALD, alcoholic liver disease; HBV, hepatitis B virus; HCC, hepatocellular carcinoma; HCV, hepatitis C virus; ICD, International Classification of Diseases; NA, not applicable; NAFLD, nonalcoholic fatty liver disease.

\*NAFLD was defined with ICD-10 codes (K760, K7581). As NAFLD is often under-coded, it was also defined with ICD-9 or 10 code for obesity, diabetes, history of bariatric surgery or both dyslipidemia and hypertension in the absence of HBV, HCV, alcohol abuse, and other known liver disease.
